# Supplementary material for: The Chemerin Receptor CMKLR1 Requires Full‐Length Chemerin for High Affinity in Contrast to GPR1 as Demonstrated by a New Nanoluciferase‐Based Binding Assay
Source: PubMed Central journal article supplement — ChemMedChem. 2022 Oct 26;17(23):e202200413. doi: 10.1002/cmdc.202200413 (PMC10092101; doi:10.1002/cmdc.202200413), 2022-10-26
Supplement: CMDC-17-0-s001.pdf [file CMDC-17-0-s001.pdf]

# ChemMedChem

Supporting Information

## **The Chemerin Receptor CMKLR1 Requires Full-Length Chemerin for High Affinity in Contrast to GPR1 as Demonstrated by a New Nanoluciferase-Based Binding Assay**

Anne Sophie Czerniak<sup>+</sup>, Kevin Kretschmer<sup>+</sup>, Tina Weiß, and Annette G. Beck-Sickinger\*

## Table of Content

### Results

|                                                                                                                             |     |
|-----------------------------------------------------------------------------------------------------------------------------|-----|
| <i>Primer sequences used for N-terminal fusion of Nluc with Ser-Gly<sub>4</sub>-Ser linker at CMKLR1-eYFP and GPR1-eYFP</i> | S-2 |
| <i>Analytics of purified [<sup>141</sup>K(TAMRA)]ChemS157(135-157) (part A)</i>                                             | S-2 |
| <i>SDS-PAGE analysis of ChemS157(21-134)-thioester (part B)</i>                                                             | S-3 |
| <i>Binding of TAMRA-C9 and internalization of Nluc-receptor constructs</i>                                                  | S-4 |
| <i>Additional displacement assay at Nluc-CMKLR1</i>                                                                         | S-5 |

**Tab. S1:** Primer sequences used for N-terminal fusion of Nluc with Ser-Gly<sub>4</sub>-Ser linker at CMKLR1-eYFP and GPR1-eYFP.

| Code | Primer           | Sequenz                                     |
|------|------------------|---------------------------------------------|
| 1    | MluI_Nluc-fw     | ATATACGCGTGCCACCATGAACTCCTTCTCCACAAGCGCC    |
| 2    | Nluc-SGGGGS_rev  | GCTGCCTCCGCCTCCGCTCGCCAGAATGC               |
| 3    | SGGGGS-CMKLR1_fw | GGAGGCGGAGGCAGCGAGGATGAAGATTACAACACTTCCATC  |
| 4    | SGGGGS-GPR1_fw   | GGAGGCGGAGGCAGCGAAGATTTGGAGGAAACATTATTTGAAG |
| 5    | eYFP_XbaI_rev    | ATATTCTAGACTACTTGTACAGCTCGTCCATGCCGAG       |

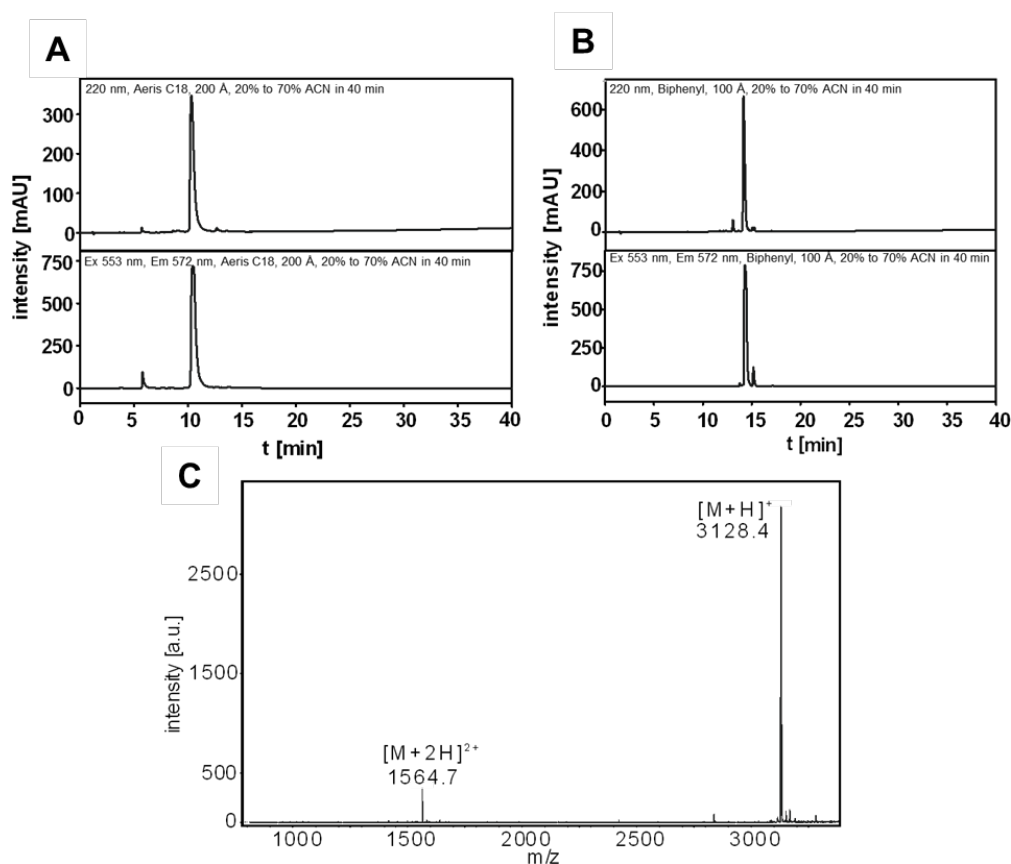

**Fig. S1: Analytics of purified [K<sup>141</sup>(TAMRA)]ChemS157(135-157) (part A).**

**A** RP-HPLC chromatogram of [K<sup>141</sup>(TAMRA)]ChemS157(135-157) recorded with Aeris C18, 200Å column. The peptide elutes after 10.3 min at 33 % ACN with a purity  $\geq 95$  %. The upper chromatogram shows the detection at 220 nm and the lower chromatogram shows the fluorescence channel. **B** RP-HPLC chromatogram of [K<sup>141</sup>(TAMRA)]ChemS157(135-157), with biphenyl C18, 100 Å column. The peptide elutes after 14.2 min at 38 % ACN with a purity  $\geq 95$  %. The upper chromatogram shows the detection at 220 nm and the lower chromatogram shows the fluorescence channel. **C** The MALDI-ToF shows the purified peptide fragment with a calculated monoisotopic mass of 3127.4 Da.

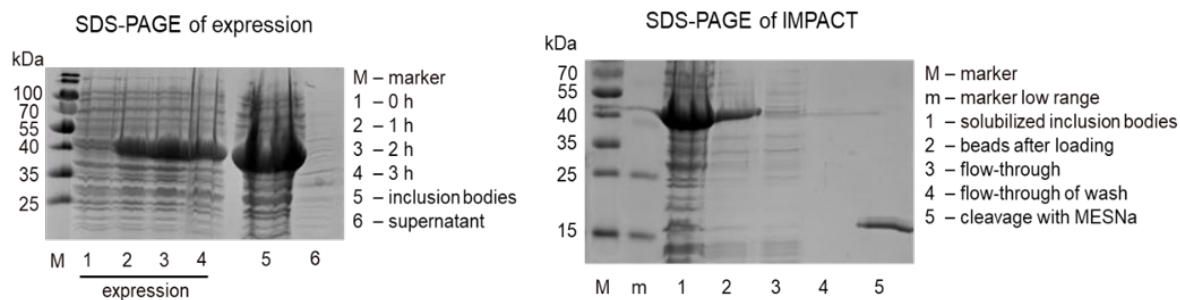

**Fig. S2: SDS-PAGE analysis of ChemS157(21-134)-thioester (part B) .**

Analysis was performed by SDS-PAGE using Coomassie blue staining. The calculated mass of the intein-CBD fusion protein is 43.6 kDa. The analysis of the expression shows no further increasing in band intensity at 40.0 kDa over 3 h, suggesting that the incubation time was sufficient. The fusion protein was expressed in inclusion bodies, indicated by the intense band at 40.0 kDa.

The SDS-PAGE of the IMPACT purification shows the solubilized fusion protein at 40.0 kDa and the MESNa cleaved product at around 15.0 kDa, which covers the calculated mass of 15.9 kDa.

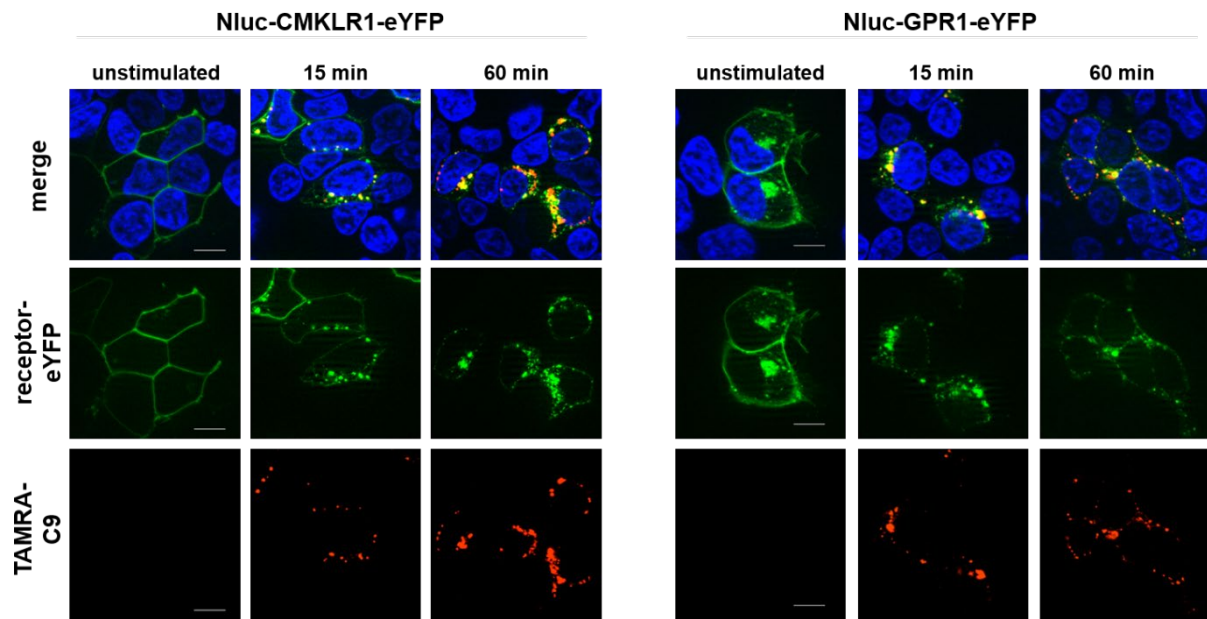

**Fig. S3: Binding of TAMRA-C9 and internalization of NIuc-receptor constructs.**

Due to inability of GPR1 to induce G protein signaling, binding and activation of NIuc-GPR1 (B) as well as NIuc-CMKLR1 (A) by TAMRA-C9 was additionally analyzed by fluorescence microscopy. Images were recorded before and after 15 min and 30 min stimulation with 1  $\mu$ M TAMRA-C9. Both receptors (green) bind TAMRA-C9 (red) and internalize upon ligand stimulation over the incubation time. Cell nuclei were stained with Hoechst 33342 (scale bar = 10  $\mu$ m).

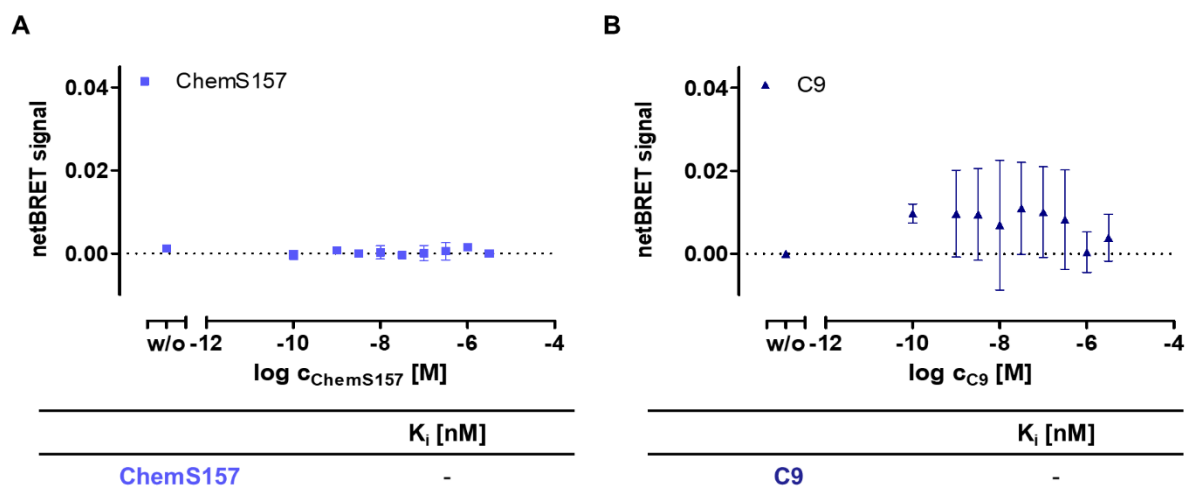

**Fig. S4: Additional displacement assay at Nluc-CMCLR1.** All assays were performed using transiently transfected COS-7 cells. TAMRA-ligand was added with defined concentration and unlabeled ligand was used with increasing concentrations. Both were incubated for 1 h on ice to reach an equilibrium. BRET signal was detected directly after addition of coelenterazine h. Each assay was performed at least two times in triplicates. **(A)** represents the displacement BRET assay results of TAMRA-C9 displaced with ChemS157. For **(B)**  $[K^{141}(\text{TAMRA})]\text{ChemS157}$  was used for labeling and competition was performed with C9.
